# Supplementary material
Source: PubMed Central journal article supplement (PMC9438216)
Supplement: 12913_2022_8499_MOESM1_ESM.pdf [file 12913_2022_8499_MOESM1_ESM.pdf]

QUESTIONNAIRE / OBSERVATION CHECK LIST

**READINESS FOR CARDIOVASCULAR DISEASE IN  
PUBLIC PRIMARY HEALTH CARE  
(PUSKESMAS)**

Interview/Observation date : \_\_\_/\_\_\_/\_\_\_ (hh/mm/yyyy)  
 Observer/Interviewer :  
 Duration : \_\_\_ Menit  
 Informant name :  
 Informant contact (HP) :

**Puskesmas Information** :  
 1. Puskesmas name :  
 2. Address :  
 3. Subdistrict/Village : /  
 4. Type of Puskesmas : In-patient and Outpatient / Out-patient only  
 5. Distance to nearest hospital : (Km)  
 6. Distance to MCC : (Km)  
 7. Number of beds : Beds (for in-patient puskesmas)  
 8. Geographic Location : \_\_\_ Latitude / \_\_\_ Longitude (DMS)  
 9. Number of POSBINDU :

| No                                                    | Question                                         | Responses            |                                                                  |                   |                      |
|-------------------------------------------------------|--------------------------------------------------|----------------------|------------------------------------------------------------------|-------------------|----------------------|
| <b>A. Population Coverage</b>                         |                                                  |                      |                                                                  |                   |                      |
| A1                                                    | Number of Household in the working area          | _____ Household      |                                                                  |                   |                      |
| A2                                                    | Number of people living in the area              | _____ Persons        |                                                                  |                   |                      |
| A3                                                    | Number of registered participant covered by INHI | _____ Persons        |                                                                  |                   |                      |
| <b>B. Resources</b>                                   |                                                  | <b>Number</b>        | <b>Trained</b><br>(Training related to CVD and its risk factors) |                   |                      |
| B1                                                    | Specialist physician (Total)                     |                      |                                                                  |                   |                      |
| B2                                                    | Cardiologist                                     |                      |                                                                  |                   |                      |
| B3                                                    | Neurologist                                      |                      |                                                                  |                   |                      |
| B4                                                    | General physician                                |                      |                                                                  |                   |                      |
| B5                                                    | Dentist                                          |                      |                                                                  |                   |                      |
| B6                                                    | Nurses                                           |                      |                                                                  |                   |                      |
| B7                                                    | Public health / Health educator                  |                      |                                                                  |                   |                      |
| B8                                                    | Pharmacist                                       |                      |                                                                  |                   |                      |
| B9                                                    | Laboratory technician                            |                      |                                                                  |                   |                      |
| <b>C. Number of patient visits per day (LB 1 PKM)</b> |                                                  | <b>Previous Year</b> |                                                                  | <b>Last month</b> | <b>Average/month</b> |
|                                                       |                                                  | <b>2019</b>          | <b>2020</b>                                                      |                   |                      |
| C1                                                    | Number of patient (total)                        |                      |                                                                  |                   |                      |
| C2                                                    | Hypertensive patients                            |                      |                                                                  |                   |                      |
| C3                                                    | Diabetes patients                                |                      |                                                                  |                   |                      |
| C4                                                    | CVD patients                                     |                      |                                                                  |                   |                      |
| C5                                                    | Heart failure patients                           |                      |                                                                  |                   |                      |
| C6                                                    | Stroke patients                                  |                      |                                                                  |                   |                      |

| <b>D. Available tests</b>    |                                                                                | <b>Methods of test /Type of device</b> |                      | <b>Available (Y/N)</b> |
|------------------------------|--------------------------------------------------------------------------------|----------------------------------------|----------------------|------------------------|
| D1                           | Total Cholesterol                                                              |                                        |                      |                        |
| D2                           | HDL Cholesterol                                                                |                                        |                      |                        |
| D3                           | LDL Cholesterol                                                                |                                        |                      |                        |
| D4                           | Blood Glucose                                                                  |                                        |                      |                        |
| D5                           | Haemoglobin (Hb) test                                                          |                                        |                      |                        |
| D6                           | HbA1c                                                                          |                                        |                      |                        |
| D7                           | Creatinin                                                                      |                                        |                      |                        |
| D8                           | Ureum                                                                          |                                        |                      |                        |
| D9                           | Blood Pressure                                                                 |                                        |                      |                        |
| <b>E. Available device</b>   |                                                                                | <b>Available (Y/N)</b>                 | <b>Working (Y/N)</b> | <b>Number</b>          |
| E1                           | ECG Machine                                                                    |                                        |                      |                        |
| E2                           | Tensimeter (Digital/Manual)                                                    |                                        |                      |                        |
| E3                           | Weight scale                                                                   |                                        |                      |                        |
| E4                           | Height scale                                                                   |                                        |                      |                        |
| E5                           | Thermometer                                                                    |                                        |                      |                        |
| E6                           | Stetoskop                                                                      |                                        |                      |                        |
| E7                           | Oxygen tube                                                                    |                                        |                      |                        |
| E8                           | Glucometer                                                                     |                                        |                      |                        |
| E9                           | CT Scan                                                                        |                                        |                      |                        |
| E10                          | Hb Meter                                                                       |                                        |                      |                        |
| <b>F. Essential medicine</b> |                                                                                | <b>Available (Y/N)</b>                 | <b>Name of drugs</b> |                        |
| F1                           | Statin (e.g : Simvastatin, Atorvastatin, Pravastatin)                          |                                        |                      |                        |
| F2                           | Antiplatelet Drugs<br>(e.g. : Aspirin, Clopidogrel, Dipyridamole, Ticlopidine) |                                        |                      |                        |
| F3                           | Anticoagulation Drugs (e.g.: Warfarin, Heparin, Enoxaparin, Edoxaban)          |                                        |                      |                        |
| F4                           | Beta-blocker<br>(e.g. Bisoprolol, Propranolol)                                 |                                        |                      |                        |
| F5                           | ACE inhibitor / ARB (e.g: Lisinopril, kaptopril, Ramipril, dll)                |                                        |                      |                        |
| F6                           | Calcium Channeling Blockers (e.g : Amlodipin)                                  |                                        |                      |                        |
| F7                           | Others                                                                         |                                        |                      |                        |

| Infrastructure and supporting equipment                               |                                                                                                                      |                                              |                       |                                   |                                                |                       |
|-----------------------------------------------------------------------|----------------------------------------------------------------------------------------------------------------------|----------------------------------------------|-----------------------|-----------------------------------|------------------------------------------------|-----------------------|
| G1                                                                    | Telephone (Hotline 24 hours)                                                                                         | Yes / No                                     |                       |                                   |                                                |                       |
| G2                                                                    | Mobile Phones / HP                                                                                                   | Yes / No                                     |                       |                                   |                                                |                       |
| G3                                                                    | Internet                                                                                                             | Yes / No                                     |                       |                                   |                                                |                       |
| G4                                                                    | Guideline books related to CVD treatment, management and controls                                                    | Yes / No<br>(guideline name: _____<br>_____) |                       |                                   |                                                |                       |
| <b>G. Ambulatory service</b>                                          |                                                                                                                      | <b>Jumlah</b>                                |                       | <b>Working (Y/N)</b>              |                                                |                       |
| H1                                                                    | Ambulance                                                                                                            |                                              |                       |                                   |                                                |                       |
| H2                                                                    | Mobile Home Care                                                                                                     |                                              |                       |                                   |                                                |                       |
| I. Services Available                                                 |                                                                                                                      |                                              |                       |                                   |                                                |                       |
| <i>Apakah puskesmas ini memberikan pelayanan terkait PJPD berikut</i> | <i>CVD Health promotion</i>                                                                                          | <i>CVD Prevention</i>                        | <i>CVD Diagnosis</i>  | <i>CVD Treatment / Management</i> | <i>Long term care / Rehabilitation for CVD</i> |                       |
| I1                                                                    | Non Communicable disease                                                                                             | (Yes/No)<br>Mention :                        | (Yes/No)<br>Mention : | (Yes/No)<br>Mention :             | (Yes/No)<br>Mention :                          | (Yes/No)<br>Mention : |
| I2                                                                    | Diabetes                                                                                                             | (Yes/No)<br>Mention :                        | (Yes/No)<br>Mention : | (Yes/No)<br>Mention :             | (Yes/No)<br>Mention :                          | (Yes/No)<br>Mention : |
| I3                                                                    | Hypertension                                                                                                         | (Yes/No)<br>Mention :                        | (Yes/No)<br>Mention : | (Yes/No)<br>Mention :             | (Yes/No)<br>Mention :                          | (Yes/No)<br>Mention : |
| I3                                                                    | Coronary heart disease                                                                                               | (Yes/No)<br>Mention :                        | (Yes/No)<br>Mention : | (Yes/No)<br>Mention :             | (Yes/No)<br>Mention :                          | (Yes/No)<br>Mention : |
| I4                                                                    | Stroke                                                                                                               | (Yes/No)<br>Mention :                        | (Yes/No)<br>Mention : | (Yes/No)<br>Mention :             | (Yes/No)<br>Mention :                          | (Yes/No)<br>Mention : |
| I6                                                                    | Puskesmas deliver referral service for emergency case for CVD (e.g.; Stroke or Heart attack/ <i>Infark Myocard</i> ) |                                              |                       |                                   | Yes / No                                       |                       |
| I7                                                                    | On the last referral case, where do the patient referred to ?                                                        |                                              |                       |                                   | Health facility name<br>( _____ )              |                       |
